# Supplementary material
Source: bioRxiv or medRxiv preprint supplement (https://medrxiv.org/highwire/filestream/93798/field_highwire_adjunct_files/2/2020.05.09.20096511-3.pdf)

Supplementary Figure 1: UMAP plot showing the distribution of the cells in the 21 clusters resulting from the unsupervised clustering of the scRNA-seq data from DKD (red) and LD biopsies (blue).

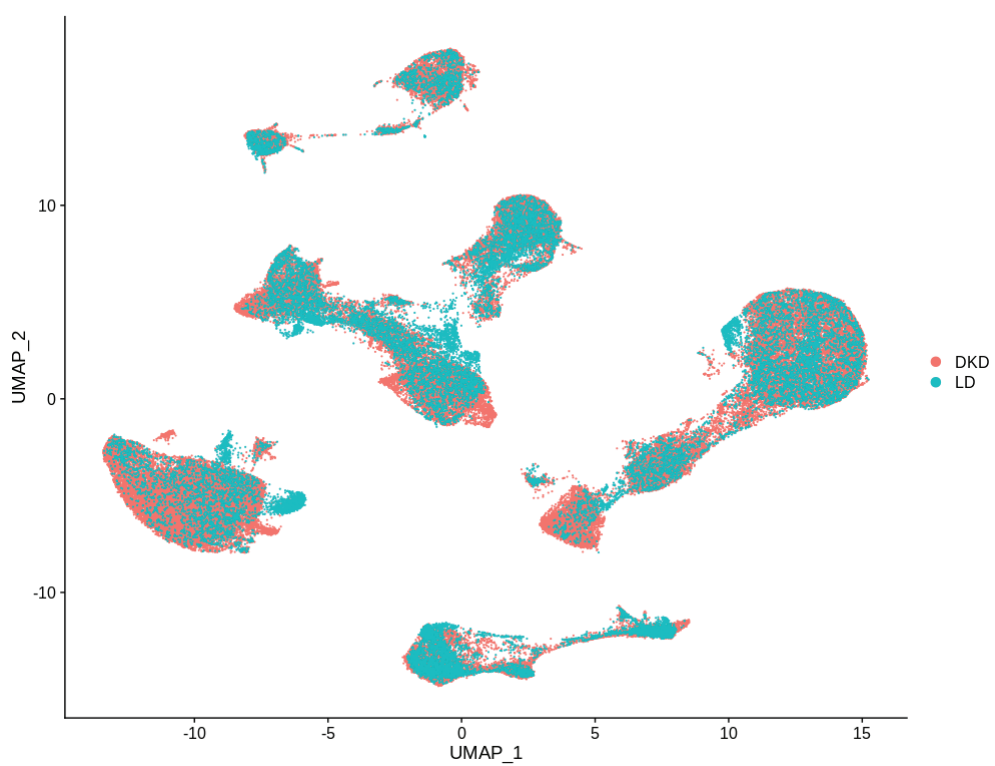

Supplement: Supplementary file [file 2020.05.09.20096511-3.pdf]
